# Supplementary material for: Synthesis and characterization of silver nanoparticle embedded cellulose–gelatin based hybrid hydrogel and its utilization in dye degradation
Source: Royal Society of Chemistry journal article supplement (doi:10.1039/d2ra03885d), 2023-01-01
Supplement: d2ra03885d1.pdf [file d2ra03885d1.pdf]

**Synthesis and characterization of silver nanoparticles embedded cellulose-gelatin based hybrid hydrogel: its utilization as dye degradation**

**Saruchi<sup>a</sup>, Vaneet Kumar<sup>\*b</sup> Diksha Bhatt<sup>c</sup>, Sadanand Pandey<sup>\*d</sup> and Ayman A. Ghfar<sup>e</sup>**

<sup>a</sup>Department of Biotechnology, CT Institute of Pharmaceutical Sciences (CTIPS), CT Group of Institutions, Shahpur Campus Jalandhar, Punjab, India.

<sup>b,c</sup>School of Natural Science, CT University, Ludhiana, Punjab, India

<sup>d</sup>Department of Chemistry, College of Natural Science, Yeungnam University, 280 Daehak-Ro, Gyeongsan, Gyeongbuk, 38541, Republic of Korea

<sup>e</sup>Department of Chemistry, College of Science, King Saud University, P.O. Box 2455, Riyadh 11451, Saudi Arabia

**\*Corresponding Author: [vaneet2106@gmail.com](mailto:vaneet2106@gmail.com), [sadanand.au@gmail.com](mailto:sadanand.au@gmail.com)**

### 3.2.4.. Thermal Behavior

Table S1: Thermal behavior of cellulose, gelatin, cellulose-gelatin backbone and C-G-g-poly(AA)

| Sample    | TGA         |                                                             |                                                             |                                                             |                                | DTA                                                                    |                      | DTG                                                                  |                      |
|-----------|-------------|-------------------------------------------------------------|-------------------------------------------------------------|-------------------------------------------------------------|--------------------------------|------------------------------------------------------------------------|----------------------|----------------------------------------------------------------------|----------------------|
|           | IDT<br>(°C) | 1 <sup>st</sup> stage<br>disintegration, °<br>C (%wt. loss) | 2 <sup>nd</sup> stage<br>disintegration, °<br>C (%wt. loss) | 3 <sup>rd</sup> stage<br>disintegration, °<br>C (%wt. loss) | FDT, °C<br>(Residue left<br>%) | Exothermic peaks at<br>different<br>disintegration<br>temperature (μV) |                      | Disintegration<br>temperature, °C<br>(rate of wt. loss in<br>mg/min) |                      |
|           |             |                                                             |                                                             |                                                             |                                | 1 <sup>st</sup> (°C)                                                   | 2 <sup>nd</sup> (°C) | 1 <sup>st</sup> (°C)                                                 | 2 <sup>nd</sup> (°C) |
| Cellulose | 211.4       | 210.9-372.4<br>(28.2)                                       | 576.5-601.3<br>(65.3)                                       | -                                                           | 610<br>(7.1)                   | 224.3<br>(91.7)                                                        | 586.7<br>(102.4)     | 285.6<br>(2.98)                                                      | 596.5<br>(0.65)      |
| Gelatin   | 225.2       | 224.8-418.4<br>(78)                                         | -                                                           | -                                                           | 417<br>(21)                    | 369<br>(72)                                                            | -                    | 312<br>(4.68)                                                        | -                    |

|                 |       |                       |                       |                       |            |                 |                  |                 |                 |
|-----------------|-------|-----------------------|-----------------------|-----------------------|------------|-----------------|------------------|-----------------|-----------------|
| Hybrid backbone | 239.6 | 239.1-375.6<br>(58.4) | 563.2-602.4<br>(38.1) | -                     | 600<br>(2) | 279.6<br>(89.9) | 601.2<br>(101.9) | 299.3<br>(0.59) | 600.4<br>(0.58) |
| C-G-g-poly(AA)  | 262.4 | 260.3-300.4<br>(21.6) | 372.6-512.8<br>(52.3) | 535.6-646°C<br>(24.2) | 644<br>(2) | 263.2<br>(79.8) | 509.6<br>(20.1)  | 285.7<br>(0.62) | 669.8<br>(0.49) |

### 3.3.2. XRD analysis

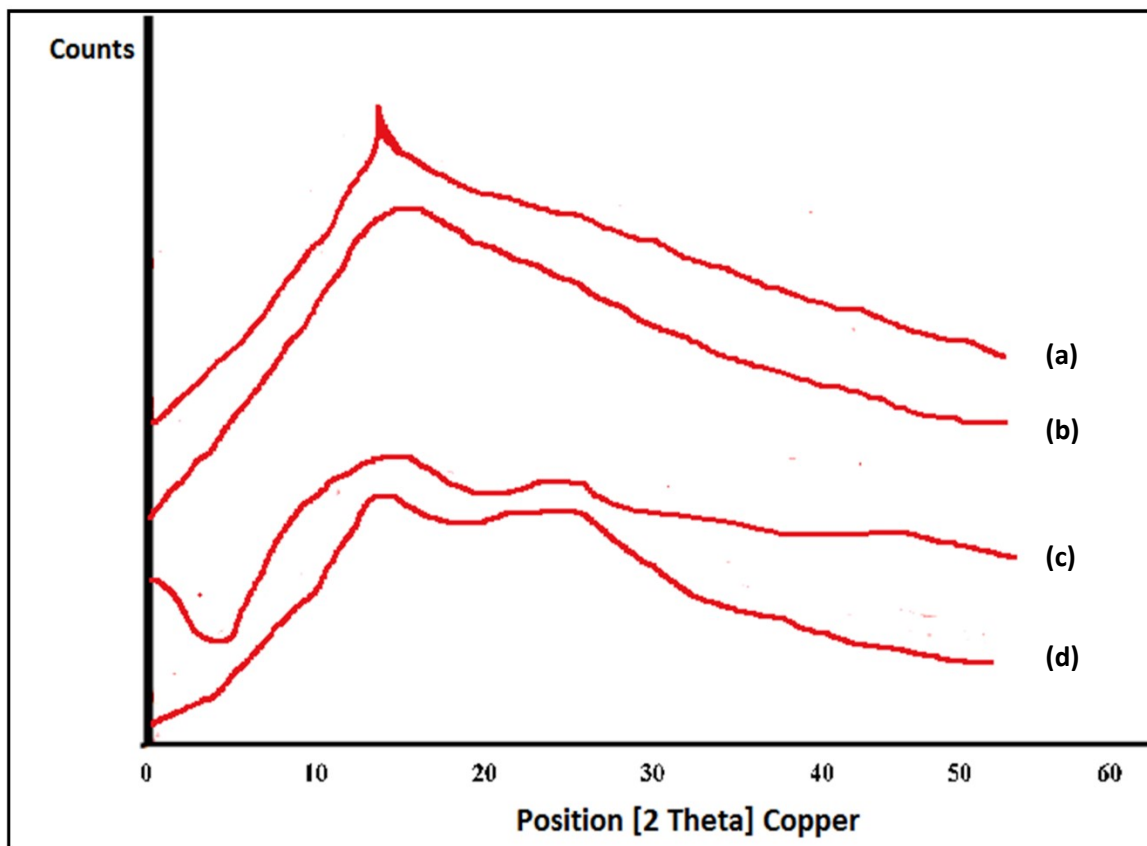

**Figs. S1a-d:** XRDs of (a) Cellulose (b) Gelatin (c) Cellulose-gelatin hybrid backbone and (d) C-g-Poly(AA)

### 3.4. Stability of synthesized AgNPs

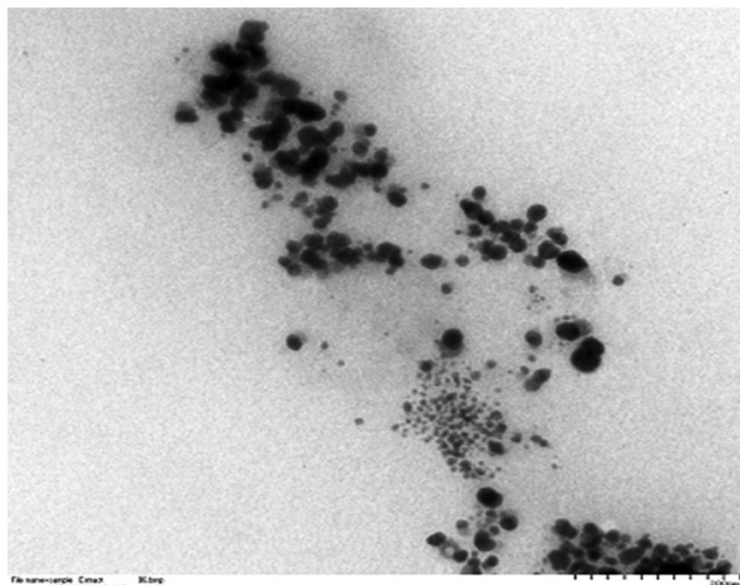

**Fig. S2:** TEM image of C-G-g-poly(AA)AgNPs after six months

### **3.5. Catalytic evaluation of synthesized AgNPs for dyes degradation**

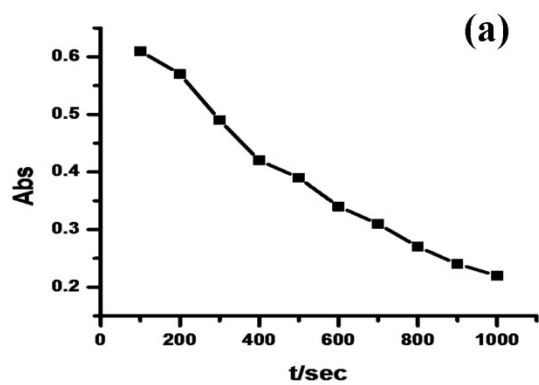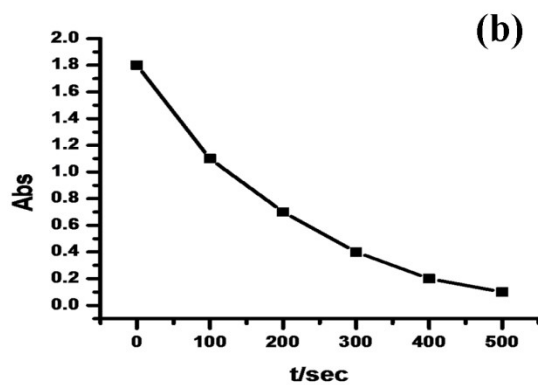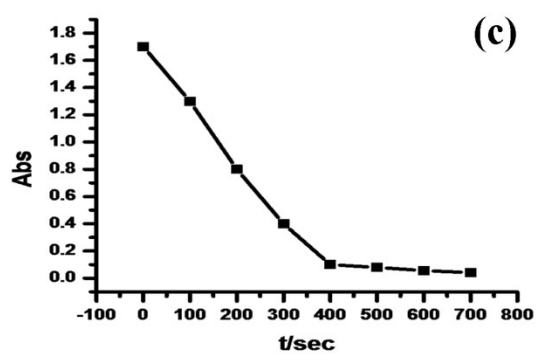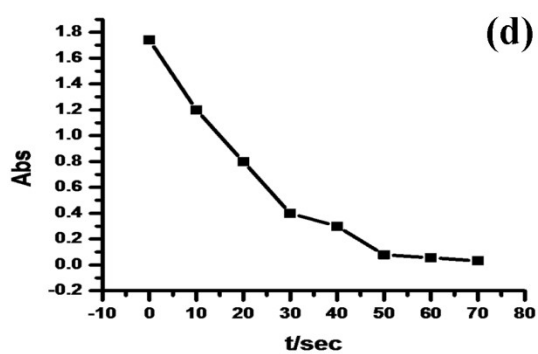

**Figs. S3a-d:** The absorbance of ethidium bromide and eosin dye versus time (a,c) in the presence of  $\text{NaBH}_4$  and (b,d) in the presence of  $\text{NaBH}_4$  and C-G- g-poly(AA)-AgNPs
